1 **Phenotypic plasticity and evolution of thermal tolerance in two lineages of bacteria from**  
2 **temperate and hot environments**

3

4 **Running title** – Constrained evolution of thermal tolerance

5

6 Hurtado-Bautista, Enrique<sup>1</sup>, Pérez-Sánchez, Laura F.<sup>1</sup>, Islas-Robles, África<sup>1</sup>, Santoyo, Gustavo<sup>2</sup>  
7 and Olmedo-Álvarez, Gabriela<sup>1\*</sup>

8 <sup>1</sup>Departamento de Ingeniería Genética, Unidad Irapuato, Cinvestav km 9.6 carretera Irapuato-  
9 León, Lib. Nte. Irapuato, CP 36824 Guanajuato, México

10 <sup>2</sup>Universidad Michoacana de San Nicolás de Hidalgo

11 golmedo@cinvestav.mx

12

13

14 **Keywords.** Phenotypic plasticity, norms of reaction to temperature, convergent evolution,  
15 thermal tolerance

16

17 **Abstract**

18 Despite the crucial role of microorganisms to sustain life on Earth, there is little research on the  
19 evolution of thermal tolerance of bacteria in the face of the challenge that global warming poses.

20 Phenotypic adaptation to a new environment requires plasticity to allow individuals to respond to  
21 selective forces, followed by adaptive evolution. We do not know to what extent phenotypic  
22 plasticity allows thermal tolerance evolution in bacteria at the border of their physiological limits.

23 We analyzed growth and thermal reaction norms to temperature of strains of two bacterial

24 lineages, *Bacillus cereus sensu lato* and *Bacillus subtilis sensu lato*, that evolved in two  
25 contrasting environments, a temperate lagoon (T) and a hot spring (H). Our results showed that  
26 despite co-occurrence of members of both lineages in the two contrasting environments, norms of  
27 reactions to temperature exhibited a similar pattern only within the lineages, suggesting fixed  
28 phenotypic plasticity. Additionally, within the *B. cereus* lineage, strains from the H environment  
29 showed only two to three °C more heat tolerance than strains from the T environment. The  
30 limited evolutionary changes towards an increase in heat tolerance in bacteria should alert us of  
31 the negative impact that climate change can have on all biological cycles in the planet.

32

### 33 **Introduction**

34 Temperature is one of the most important physical factors that define a species fundamental niche  
35 (1). It affects many phenotypes, and numerous investigations on adaptation have focused on  
36 temperature to understand how it impacts physiological processes at the molecular level (2,3).  
37 Temperature affects a broad range of phenotypes, so it is used as a model to investigate how  
38 phenotypic plasticity evolves. Understanding phenotypic plasticity has become of high  
39 importance, given the expected temperature rise in the planet. Studies in ectotherm groups have  
40 suggested that variation in upper thermal limits is narrower compared to that of lower  
41 temperature and have suggested that evolution of heat tolerance is constrained. This asymmetry  
42 has been reviewed for terrestrial endo- and ectotherms, insects, amphibians and plants (4,5), and  
43 more recently an extensive data set was analyzed by (6).

44 In contrast to the many studies that have been done in eukaryotes to determine their thermal  
45 plasticity, in bacteria, there are few examples. Unlike the restrictions to the temperatures where  
46 eukaryotic organisms can thrive, Archaea and Bacteria can be found in extreme environments,

47 from freezing (-40 °C) (7), to very high (50 and to 100 °C) (8). Their ubiquitous occurrence does  
48 not mean, however, that individual phylum or species have a broad spectrum of tolerance to  
49 temperature. Like eukaryotic ectotherms, individual bacterial taxa exhibit a limited temperature  
50 niche.

51 Phenotypic plasticity is the ability of an organism to exhibit distinct phenotypes when exposed to  
52 different environments (9,10), and allows organisms to acclimate to changes, extending the  
53 ecological range of a species, so they can survive exposure to pressures and creating the  
54 opportunity for assimilation (Waddington 1953, cited by (11). Assimilation is the mechanism  
55 through which the initial plastic response allows diversification through genetic changes that  
56 stabilize the expression of the induced phenotype (12). Interaction among plasticity, life history  
57 and evolution persist for generations (13).

58 Organisms' genetics is the basis of phenotypic plasticity and the degree to which an organism can  
59 alter its phenotype, partly governed by functional genomic mechanisms, will contribute to  
60 delimiting the range of environmental conditions to which it can acclimate. If an individual's  
61 biological response to a changing environment is a function of gene content and its regulation, it  
62 could be expected that genetically close organisms that experience similar environmental  
63 pressure may exhibit similar plasticity to respond to that particular stress. However, when species  
64 encounter changes in their environment, long term persistence will require the evolution of their  
65 plasticity. Since some habitat will, in fact, be less favourable to fitness, costs and limits to the  
66 evolution of phenotypic plasticity are expected (14).

67 Temperature is a chosen variable in many studies that evaluate patterns of growth rate, survival,  
68 reproduction and doubling time in the population of bacteria. Growth rate represents a simple  
69 response variable of continuous phenotypes (15). Phenotypic plasticity can be evaluated through

70 reaction norms (10,16, and Wolterek, 1909, cited by (11)). Reaction norms are a description on  
71 how a phenotype varies as a continuous function of the environmental cues and is represented by  
72 a curve on a graph that plots a phenotype against an environmental factor (Figure 1a). In a  
73 historical account on the study of norms of reaction, (11) cites Dobzhansky's writing: "what  
74 changes in evolution is the norm of reaction of the organism to the environment". The complete  
75 reaction norm is a trait, and thus may be different between genotypes; it is genetically variable  
76 and thus, it can evolve.

77  
78 Only 0.3% of the studies on plasticity-led evolution have been done in bacteria (17). The few  
79 studies on phenotypic plasticity to temperature in bacteria have been carried out on model  
80 laboratory bacteria, such as *Bacillus subtilis* (18) and *Escherichia coli* (see, for example, 19–21).  
81 However, these strains may not be optimal to capture the complexity of plasticity, as many traits  
82 may have been lost through passages under laboratory conditions. Genetic analyses have revealed  
83 genetic variation for thermotolerance under laboratory conditions (22 and references therein), but  
84 thermal plasticity of bacteria as a result of selection pressures in nature remains largely unknown.

85  
86 The *Bacillus* genus is characterized by endospore-forming bacteria, and representatives of this  
87 genus are present in almost every wild environment around the world (23–25). *Bacillus* is an  
88 interesting model to study phenotypic plasticity. Its ability to develop a highly resistant spore  
89 allows survival at a temperature that would be lethal for the vegetative cell, thus allowing it to  
90 survive extreme changes. How then could refinement of its phenotype to tolerate higher  
91 temperature occur if the immediate response of these bacteria to stress was sporulation? The fact  
92 that the *Bacillus* can tolerate heat in their sporulated form does not make the *Bacillus*

93 thermophiles, as most species cannot grow above 50°C. Some *Bacillus* species have been  
94 recovered from extreme environments and are thermophiles, such as *Bacillus infernus* and  
95 *Bacillus fumarolis* (26), but the best-studied thermophilic genus in the Firmicutes are usually  
96 classified in different genera, such as *Geobacillus*, *Thermaerobacter*, and *Thermobacillus* (27).

97  
98 It has been of interest to understand the capability of a given species to occupy different thermal  
99 niches. Hot springs have been recurrent systems for investigating niche diversification in natural  
100 communities of microorganisms, and thermophilic bacteria thrive in these environments. Weltzer  
101 and Miller showed that *Chloroflexus* strains from the White creek thermal gradient have diverged  
102 in the temperature range for growth (28). On the other hand, laboratory strains of the  
103 *Synechococcus* A/B group of cyanobacteria isolated from different temperatures from both  
104 Yellowstone and Oregon hot springs are ecological specialists with divergent temperature ranges  
105 for growth (29).

106  
107 Although some *Bacillus* strains representatives of mesophilic clades are sometimes isolated from  
108 hot-springs, there is typically little information of their taxonomy and even of their temperature  
109 tolerance. It is possible that, with a few exceptions, many strains in the *Bacillus* genus isolated  
110 from hot-springs are not thermophilic and they tolerate heat as spores. For instance, seldom are  
111 mesophilic *Bacillus* species, such as *Bacillus cereus* and *Bacillus subtilis*, recovered from hot  
112 springs. Being so ubiquitous, can they extend their range of temperature tolerance and evolve into  
113 thermophilic strains?

114

115 Among the numerous *Bacillus* species recognized, some lineages have been extensively studied,  
116 such as the *B. cereus sensu lato*, that includes *Bacillus cereus*, *Bacillus thuringiensis*, and  
117 *Bacillus anthracis* ((30), and the *Bacillus subtilis* complex, that includes *Bacillus subtilis*,  
118 *Bacillus amyloliquefaciens*, *Bacillus licheniformis*, and *Bacillus pumilus*, among others (27,31).  
119 The most recent study by (24) through the use of 700 conserved genes, showed that the *B. cereus*  
120 and *B. subtilis* lineages form two distinct clades. At genome level, genome size and gene content  
121 are distinct in these two lineages. *B. cereus* typically possesses a genome of between 5 to 6 mega  
122 base pairs, while the genome of *B. subtilis sensu lato* is around 4 mega bases long (32).

123  
124 Bacteria, in general, exhibit considerable genetic variability, in part from their ability to  
125 interchange genes through horizontal gene transfer. Within the genus *Bacillus* there is a large  
126 intraspecies phenotypic variability (33) and a significant variation in the genetic repertoire  
127 through microevolution (34). Up to 30% of genes may be different within bacterial species (35).  
128 Organisms that have evolved in a given environment may be constrained in their response, maybe  
129 from having adjusted their genes to their particular environment (24). If this was the case, their  
130 life history could come very close to constitute its genetic history as well. Bacteria are excellent  
131 models to explore the evolution of plasticity, through the evaluation of reaction norms to  
132 temperature. Their genetic variability makes them special cases to explore whether the genetic  
133 mould is so malleable that their norms of reaction change to adjust to the environment or if, on  
134 the contrary, despite this variability, their reaction norm is fixed, such that it can be a trait of the  
135 phylogeny. At the molecular level, temperature response has been extensively studied in bacteria  
136 and particularly the response elicited by both cold- and heat shock (36,37). We do not know,

137 however, whether the large repertoire of genes required for thermal adaptation constrains the  
138 evolution of tolerance.

139  
140 In this work, we evaluated phenotypic plasticity to thermal tolerance in a lineage Vs.  
141 environment model in bacteria from natural settings. By examining the evolution of upper  
142 thermal limits in bacterial strains from contrasting environments, it is possible to evaluate trait  
143 limits related to evolutionary history. The bacterial strains used in this study comprised two  
144 lineages within a genus, *B. cereus sensu lato* and *B. subtilis sensu lato*. The strains were obtained  
145 from a hot-spring (environment H) and a temperate lagoon (environment T), both in Mexico, and  
146 were used to address the following questions: Do individuals of closely related lineages with a  
147 similar history of temperature selection (either in the hot-spring or in the temperate lagoon)  
148 exhibit convergence in their norms of reaction? Do the Bacillus from the hot-springs evolve  
149 tolerance to temperature in their vegetative stage?

150  
151 Our results showed that reaction norms to temperature of the different individuals reflected their  
152 evolutionary history. The *B. cereus* and *B. subtilis* lineages each exhibited distinct response  
153 patterns, suggesting that the genetic architecture of each lineage constrained their phenotypic  
154 plasticity despite their sharing of environmental conditions. For both lineages, covariation was  
155 observed between environmental temperature and thermal tolerance phenotype, suggesting  
156 temperature adaptation. The individuals from the hot-springs were, as expected, more tolerant to  
157 hot temperature, yet, their tolerance did not match the hot-springs temperature suggesting,  
158 particularly for the *B. cereus* lineage, that its ecological strategy depends mainly on sporulation.

159 These results may suggest that sporulation decreases the opportunity for evolving tolerance and  
160 that the lineage in its vegetative state is already close to its thermal tolerance limit.

161

## 162 **Materials and Methods**

### 163 **Evaluation of mesophile and thermophile strains**

164 Bacteria classified as mesophilic can tolerate a range of 18 to 45 °C, while thermotolerant  
165 bacteria tolerate from 22 to 60 °C. Both mesophilic and thermotolerant bacteria have growth  
166 optima below 50 °C. Thermophilic bacteria, in contrast, have an optimal growth temperature  
167 above 60 °C (38). Mesophilic *Bacillus* were collected from the Churince water system, where  
168 daily and seasonal variation in temperature have been recorded, since the spring is fed by  
169 subterranean water and the system is held in a range of 31°C near the water spring and closer to  
170 ambient air temperature, 18-31 °C, in the faraway limits of the lagoon system (39). The  
171 thermotolerant *Bacillus* strains in this study were collected in the geothermal system of the Araro  
172 region, located in the central part of Mexico, inside the trans-Mexican volcanic belt located in the  
173 Michoacan state. The dominant bacteria in this extreme environment were firmicutes, inhabiting  
174 the microbial mats in the springs (40). Temperature and physicochemical parameters were  
175 evaluated in different seasons and found to fluctuate between 45 and 55 °C (Bonita spring) and  
176 63 o 74 °C (Tina hot-spring) (40). For this study, we chose sets of strains from two closely related  
177 taxa, both of the *Bacillus* genus (as explained below). Six were isolated from the Temperate  
178 intermediate lagoon (environment T) and six more from the hot-spring in Michoacan  
179 (environment H) (Fig. 1a). We included a *B. subtilis* laboratory strain, PY79, presumably  
180 mesophilic (41). Bacterial strains were kept in frozen stocks at -70 °C. To observe the phenotype  
181 of their colonies selected strains were streaked out on semisolid Marine medium and incubated



182 for 24 h to 48 h at 37, 44, 50 and 55 °C (Photographs of some of the plates are shown in  
183 Supplementary Fig. 1).

184

### 185 **Strain selection from 16S rRNA phylogenetic reconstruction analysis**

186 PCR of 16S rRNA genes was obtained from a collection of strains from the temperate lagoon and  
187 the hot-springs. Forward and reverse sequences were obtained by Sanger dideoxy sequencing,  
188 edited by cutting off low-quality segments and concatenated as a consensus sequence for each  
189 gene using Bioedit version 7.0.5.3. (See Supplementary Fig. 2). Phylogenetic analysis was done  
190 in Mega 7.0.26, after alignment using Muscle. We chose six strains that grouped with the *B.*  
191 *cereus sensu lato* (were 99 % similar based on sequence variation of the 16S rRNA gene) and six  
192 strains from the *B subtilis* lineage. For the simplified phylogeny shown in Fig. 1b, gene  
193 alignment of the 16S rRNA gene of the 13 chosen strains was carried out using Muscle and tree  
194 construction was performed by the Maximum Likelihood method with the HKY+G substitution  
195 model using MEGA version 7.0.26 (42).

196

### 197 **Determination of growth rates evaluation and norms of reaction**

198 Bacterial isolates from -70°C stocks were reactivated on semisolid Marine Medium (43) at 37°C  
199 for 20 hrs. One colony from each strain was inoculated into to 50 ml Falcon tubes with 5 ml of  
200 Marine medium-broth and incubated overnight at 37°C in a shaking incubator. After 18 hours of  
201 incubation, an aliquot of 50 µl from the cultures, was transferred to tubes with fresh Marine-broth  
202 and incubated two more hours to bring them to exponential growth condition, before  
203 measurement of the growth kinetics curve. Five µl of each culture was used for inoculating 200-  
204 well microtiter plates of the Bioscreen C (Labsystems, Helsinki, Finland) previously filled with

205 175 µl of fresh Marine medium-broth. Measurements were carried out with a 420-580 nm filter,  
206 with three replicas. Optical density was measured every 30 min for 20 h. For reaction norms to  
207 temperature we obtained kinetic curves at 17, 27, 37, 41, 43, 46, 49 and 55°C. Doubling time was  
208 calculated using an exponential model of growth for building the reaction norms for each  
209 temperature and evaluated the difference among groups with a t-Test (supplementary figures).  
210 Multiple statistical Anovas (0.05 of significance) for comparison throughout all the entire  
211 reaction norms were performed in Statgraphics version 15.2.06. The optimal temperature was  
212 defined as that with the maximum peak in growth rate throughout the range of tested  
213 temperatures. The thermal niche was calculated as the range of temperatures over which the  
214 observed doubling rate equaled or exceeded 75% of the peak doubling rate (3). For the evaluation  
215 by groups of reaction norms, we combined a set of results from the reaction norm for every  
216 temperature value. While comparing species we grouped data of growth rate at each temperature  
217 of *B. subtilis* strains from both environments and compared against the grouped *B. cereus* data.  
218 To compare environment we grouped the growth rate data of each temperature of *B. subtilis* plus  
219 *B. cereus* from each one of the places of origin. An ANOVA in R package 3.6.2 (with  
220 significance level at 0.05) to identify statistical differences in the double comparison.

221

## 222 **Results**

223

### 224 **Evaluation of phenotypic plasticity in a *Bacillus* two-lineages model, each with members** 225 **that evolved in contrasting temperature environments**

226 We studied *Bacillus* isolates in a classical gene X environment setup, using strains isolated from  
227 sediment in the Intermediate lagoon of Churince in Cuatrociénegas, Coahuila (43) and isolates

228 cultivated from the mats of hot-springs in Michoacán (40). The two different environments  
229 appear to have non-overlapping temperature ranges. The temperate water and sediment of the  
230 Churince system, from which part of our microbial collection was obtained, has a temperature  
231 that fluctuates between 18 to 36 °C (we refer to this as Environment T), while that of the hot  
232 spring fluctuates between 45 and 70 °C (Environment H) (Fig. 1a). *Bacillus* strains are easily  
233 recovered from both the T and H environments. The strains used in this work have been  
234 previously reported (40,43). Phylogenies based on 16S rRNA gene of several strains from the  
235 different environments were obtained to select those that would be genetically closest  
236 (Supplementary Fig. 2). Emphasis was made in clades *B. subtilis sensu lato* and *B. cereus sensu*  
237 *lato*. These lineages are referred to as Bc and Bs, for short. We chose three strains from each  
238 *Bacillus* lineage and from each environment (H and T) to evaluate phenotypic plasticity through  
239 comparative norms of reaction. We also included in the study a laboratory strain of *B. subtilis*,  
240 strain PY79 (41). A simplified phylogeny is shown in Fig. 1b.

241

## 242 **Growth and colony size differences between the Bc and Bs lineages challenged at high** 243 **temperature**

244

245 Colony growth was evaluated on semisolid marine medium with incubation at different times and  
246 temperatures (Fig. 2 and Supplementary Fig. 2). We observed growth and colony size differences  
247 between strains from the Bs and Bc lineages. Regardless of the environment of isolation, the Bs  
248 lineage strains were more tolerant to high temperature than those of the Bc lineage, although the  
249 size of single colonies was generally smaller than those of the Bs lineage. The strains from the Bs  
250 lineage from the environment T can still grow at 50 °C, although forming small colonies. In two

251 of these strains Bs-T-427 and the laboratory strain PY79, some growth can be observed even at  
252 55 °C. Strains from the Bc lineage, in contrast, cannot grow at 50 °C. The strains from the Bc  
253 lineage from environment H exhibited perceptibly larger colonies than their counterparts from  
254 environment T, and even at 44 °C grew robustly, suggesting adaptation of these strains to growth  
255 at this temperature. Noteworthy, even when challenged at higher temperature (44 °C), colony  
256 growth was sustained, since colony size after 48 h incubation was noticeably larger than at 24 h  
257 incubation (see Fig. 2 for a schematic of colony size).

258  
259 **Distinct norms of reaction to temperature of the two *Bacillus* lineages that co-occur in the**  
260 **Churince temperate lagoon**

261 Phenotypic plasticity was assayed through the norm of reaction to temperature for each strain.  
262 Growth curves obtained temperatures from 17 to 55 °C. The thermal niche of each strain was  
263 calculated as the range of temperatures over which the observed doubling rate equaled or  
264 exceeded 75% of the peak doubling rate (3) (Fig. 1c). In this gene for environment evaluation  
265 different norm of reaction scenarios were possible (Fig. 1c and 1d): In one scenario (fixed  
266 plasticity), bacteria from both lineages could exhibit the same response to temperature, regardless  
267 of the environment where they had evolved. In a second scenario, a shift of tolerance towards  
268 higher temperature in both lineages would be observed. In this last case, the selective  
269 environmental pressure would result in a convergent phenotypic response regardless of the  
270 lineage. In this scenario, strains from the Bs and Bc lineage would exhibit the same response to  
271 temperature within each environment. In a third scenario, even if strains from environment H  
272 tolerated higher temperature than those from environment T, each individual would exhibit  
273 dissimilar norms of reaction to temperature, regardless of the lineage.

274

275 Fig. 3a shows the profiles of the norms of reaction to temperature for the strains from the  
276 temperate lagoon (T environment). It is observed that despite sharing the same environment, the  
277 norms of reaction of the two lineages did not converge. The individuals from the T environment  
278 of the Bc and Bs lineage had norms of reaction with a distinct pattern, clearly different from one  
279 another. All Bc strains exhibited a higher growth rate at temperatures from 17 to 40 °C, but  
280 growth fell sharply above this temperature. The strains from the Bs lineage exhibited a lower  
281 growth rate at all temperatures but could still sustain growth 2 °C above the Bc strains. Despite  
282 experiencing the same fluctuations in temperature in the sediment of the small Churince lagoon,  
283 the two lineages could be easily discerned by their norm of reaction, suggesting differences in  
284 phenotypic plasticity.

285

286 **Norms of reaction to temperature, a trait that differentiates the *Bacillus* lineages that co-**  
287 **occur in the hot-spring**

288 Fig. 3b shows the profiles of the norms of reaction to temperature for the strains from the hot-  
289 spring. Norms of reaction to temperature of the strains belonging to the Bs lineage were more  
290 similar among them while those of the Bc lineage closely resembled each other. A higher  
291 selective pressure to temperature in a hot-spring did not lead to convergence of the two lineages  
292 in response to temperature; it seems thus that the distinct lineage-specific norm of reaction to  
293 temperature is a “stable” trait. As observed for these lineage strains from the temperature lagoon,  
294 a higher growth rate of the Bc lineage strains, followed by an abrupt drop was observed  
295 compared to that of the Bs strains, for which their growth pattern stretched smoothly towards  
296 higher temperatures.

297

298 **Evolution of tolerance to higher temperature of strains from the hot-spring**

299 The strains of the Bs lineage in the H environment exhibited a wider range of temperature  
300 tolerance than those of the Bc lineage. Strains of Bs lineages sustained growth rate at higher  
301 temperature, and they reached a plateau and maintained the same growth response for a wide  
302 range of temperatures, to the point that no single optimal growth temperature could be defined.  
303 Growth only dropped at temperatures close to 50 °C (Fig. 3c).

304 In contrast, the strains from the Bc lineage from the hot-spring could reproduce more efficiently  
305 than those of the strains from the Bs lineage through all the temperature spectrum tested, until the  
306 temperature reached 42 °C, and then an abrupt drop in growth ensued. This can be clearly  
307 observed when comparing Fig. 3c, for lineage Bs, with Fig. 3d, for lineage Bc, as these graphs  
308 combine the norms of reaction from the T and H environment. Clearly, both Bs and Bc strains  
309 from the H environment exhibited higher tolerance for growth at temperatures above 42 °C, than  
310 those from environment T, suggesting that the strains have adapted to grow at a higher  
311 temperature. However, tolerance to temperature does not exceed more than a couple of °C more  
312 than the tolerance exhibited by the strains from the T environment. Even though the hot springs  
313 measured temperature fluctuate from 46 to 70 °C, these lineages do not exhibit plasticity to grow  
314 at temperatures above 45 °C. Noticeably, there is a tendency for strains from environment H to  
315 grow less at temperatures below 37 °C. A co-variance of higher temperature tolerance with a  
316 lower tolerance at lower temperature suggests a trade-off in phenotypic plasticity. The fact that  
317 each lineage exhibited a particular pattern and none of the strains in the Bc lineage could grow  
318 beyond 45 °C, supports the concept that the degree to which an organism can alter its phenotype

319 is governed by its genetic architecture, that delimits the range of environmental conditions to  
320 which it can adapt.

321

### 322 **Thermal niche of strains from hot-springs and from the temperate lagoon**

323 Fig. 4 is a summary of the measured parameters for both mesophilic and temperature-tolerant  
324 stains in both lineages, including thermal niche, optimum temperature and specific growth  
325 reached by individual strains at their optimal temperature (37 °C for most strains). The amplitude  
326 of the curve in the norm of reaction is the breath of the performance of the individual to a range  
327 of temperatures, while its thermal niche is the rank between the two lower and upper values of  
328 75% of maximal growth at an optimal temperature, as described by (3). Regardless of lineage, all  
329 strains from the hot-spring exhibited a shift in their capability for growth at a higher temperature.  
330 For two strains in the Bc lineage from the H environment (strains Bc-H-51 and Bc-H-11), the  
331 extension in the capacity for growth at higher temperature seemed to impose a trade-off for  
332 growth at the lower temperature, and only strain Bc-H-28 exhibited increased tolerance without  
333 trade-off at low temperature. One of the strains from the Bs lineage from environment H (Bs-H-  
334 2) also exhibited a markedly lower capacity for growth at a lower temperature. All other strains  
335 from environment H exhibited a similar capacity for growth at a lower temperature as those from  
336 environment T, suggesting that they possessed the ability to grow at a wider range of  
337 temperatures.

338 The optimal temperature for growth for all strains from both the Bc and Bs lineages that evolved  
339 in the T environment was 37 °C. Notably, all strains in the Bs clade from the environment H has  
340 a shifted optimal growth temperature to 43 °C (Bs-H-30 and Bs-H-2) and even to 49 °C (Bs-H-  
341 45). Interestingly, Bs-H-30 exhibited a plateau of optimal growth with a second optimal peak at

342 49 °C. It is intriguing that the laboratory strain, Bs PY79, exhibited a wide range of growth and  
343 even an optimal growth at 41 °C. The greater tolerance to temperature of *B. subtilis* compared to  
344 *B. cereus* lineage agrees with data obtained on semi-solid medium (Fig 2 and Supplementary Fig.  
345 1).

346 It is evident that the strains from the Bc lineage from the H environment exhibited only 1 to 2 °C  
347 advantage in temperature tolerance and increased minimally their maximum capacity for growth.  
348 However, the specific growth rate of the Bc lineage strains, from either environment was always  
349 higher than that of strains from the Bs lineage, and this growth ability seems to be a trait of the  
350 species (Figure 4). This was also observed in the formation of larger colonies on plates (Fig. 2  
351 and Supplementary Fig. 1).

352 Noticeable, within the Bc lineage, both optimal growth temperature and maximum optical density  
353 reached by the different strains measured at 37 °C, was similar to that of their counterparts from  
354 the temperate lagoon. The growth dynamics of Bc lineage isolates from the H environment do not  
355 exhibit the phenotypic plasticity expected for an organism from a constant environment above 46  
356 °C. A graphic of the grouped data of the T and H strains from each of the lineages shows a clear  
357 lineage-specific norm of reaction to temperature (Fig. 5a), with the only point of convergence at  
358 43 °C. The Bs lineage showed higher plasticity for growth at a higher temperature (strains from  
359 the T environment and, as expected, those from environment H). The strains within each lineage  
360 conserved a characteristic pattern in the norm of reaction that did not converge in their shared  
361 environments (Fig 5a). No statistical differences were observed when strains from T and from H  
362 were combined (Figure 5b) to compare environments, suggesting that species lineage exhibited a  
363 stronger signal in plasticity than the environment.

364



365 DISCUSSION

366 It has been observed that realized niches for species in warm environments are closer to their  
367 physiological limits (5), but this has hardly been explored for bacteria. The presence of the same  
368 two *Bacillus* lineages in two contrasting environments, temperate and hot, provided the  
369 opportunity to evaluate the effect of evolutionary history on phenotypic plasticity as a response to  
370 temperature selection. A hot-spring constitutes selective pressure at what appears to be the edge  
371 of surviving temperature for mesophilic strains. Reaction norms, as a property of individual  
372 genotypes, allowed us to explore in a bacterial model the extent of phenotypic plasticity as the  
373 result of environmental history and the possible genetics constraints in two lineages.

374 There are reports of convergent evolution in bacteria when subject to experimental evolution  
375 (21). If bacteria isolated from the same environment responded in the same way to environmental  
376 challenges, despite differences in evolutionary history, this would suggest that prolonged  
377 evolution under stable conditions could lead to homogenous strategies to face environmental  
378 challenges. In our study, the evaluated species Bs and Bc lineages exhibited only intraspecific  
379 similarities rather than convergence patterns among the strains sharing a common selection  
380 regime (T or H). This suggests that deep evolutionary history of the individuals had set the  
381 genetic frame that determined their response to temperature, limiting their plasticity. This agrees  
382 with observations that plasticity to temperature can be regarded as a species trait (44).

383 Bs and Bc exhibited differences in their plasticity. The Bc lineage, with characteristic norms of  
384 reaction, showed an abrupt drop in growth after 42 °C. This behaviour has been called striking  
385 asymmetry and has been observed for reaction norms to temperature of many organisms, as  
386 performance increases and reaches an “optimal” level and then rapidly decreases near the lethal  
387 temperature (45). In contrast, the strains belonging to the Bs lineage exhibited a broader curve of

388 tolerance and the strains from the H environment extended their tolerance to 47 °C, ten degrees  
389 above their optimal of 37 °C. The phenotypic plasticity of Bs seems to be superior in the isolates  
390 evaluated, including the laboratory strain PY79. It has been reported that Bs strain 168 can grow  
391 up to 52 °C (46). It is intriguing that the laboratory strain exhibits higher plasticity to  
392 temperatures it has probably not experimented, while Bc from the hot-spring did not become  
393 more tolerant to temperatures it has experimented possibly for centuries.

394 Another distinction between the lineages is the noticeable difference in growth and maximum  
395 growth rate (within their optimal range of temperature tolerance), with Bc strains exhibiting a  
396 faster growth rate than Bs. This also seems to be a lineage trait that did not change in either of the  
397 clades as long as it was evaluated within their thermal niche (Fig 4a). We had expected a  
398 decrease in the duplication time of the Bc strains, from the hot-spring as a possible trade-off of  
399 the ability to sustain growth at a higher temperature. This was not observed even at 44 °C. Its  
400 ecological strategy seems to be shifted towards faster growth, maybe to compensate that it can't  
401 sustain growth at a higher temperature. This suggests that Bc is a specialist, with an r strategy,  
402 while Bs is a generalist, given the wide breadth of its thermal niche. These characteristics could  
403 have important implications when being part of a microbial community, particularly in  
404 constraining environments (47).

405  
406 Our results suggest that sporulation is a form of plasticity that limits evolution. Since the *Bacillus*  
407 can sporulate, their thermal niche has to be defined for the vegetative and for the full  
408 developmental program leading to spore formation. For the *Bacillus* spp. (and other  
409 microorganisms), sporulation is the ultimate survival strategy allowing them to resist harsh  
410 environmental conditions (temperatures of 70 to 80°) for prolonged periods (48). However,

411 sporulation is costly in time and energy investment and is a terminal differentiation decision.  
412 Endospore formation takes 8 h, and a genetic reprogramming that involves around 150 genes  
413 (49). Entering the sporulation process and remaining as spores would make the *Bacillus*  
414 numerically less competitive than if they could grow at a higher temperature in the hot-spring,  
415 where there may not be much of an environmental “intermission”. Although surviving is always  
416 a better option, this seems to be a case where sporulation limits genetic change and thus limits  
417 evolution towards heat tolerance in the vegetative stage. The spore has in fact been shown to  
418 evolve impressive features to shield DNA from damage (50). Although the *Bacillus* recovered  
419 from environment H could tolerate higher temperature in a vegetative stage than those from  
420 environment T, their optimal temperature for growth is still around 37°C and, surprisingly, they  
421 don't grow above 50 °C. For the hot spring strains, phenotypic plasticity falls short at  
422 temperatures above 44 °C to 47 °C. With a limited thermal maximum for vegetative growth,  
423 these *Bacillus* probably survive in the hot springs as spores. If, as it has been suggested, under  
424 conditions in which plasticity is favoured, genetic variation can be limited (9), this might be a  
425 good example of this situation, as sporulation could limit the selection of tolerance in the  
426 vegetative phase. In addition to this possibility, could it be that no further tolerance to  
427 temperature can evolve in the vegetative stage, that the limit has been reached in these lineages?  
428 Our data showed that strains from environment H, as expected, were able to tolerate higher  
429 temperature for growth. This is consistent with data from experimental evolution studies using  
430 temperature as a selective environment and with data of bacterial isolates from natural  
431 environments. Experimental evolution work has been done mainly in *E. coli*. Populations evolved  
432 increased competitive fitness in the thermal regime that they experienced during the experiment  
433 (51), (22). The results from Bennett *et al.* (51) showed that *E. coli* strains evolved at 42 °C, can

434 shift their tolerance towards higher temperature. On the other hand, experimental evolution of *E.*  
435 *coli* populations evolved for 20,000 generations at 37 °C were used to explore whether  
436 evolutionary adaptation to one particular environment leads to loss of performance in alternative  
437 environments. It was observed that improved performance at moderate temperature reduced  $V_{\max}$   
438 at extreme temperature (52).

439 Regarding bacteria from natural settings, Bronikowski *et al.* (3) did not observe variation in  
440 growth profiles for *Salmonella* or *E. coli* (comparisons within groups) isolated from turtle  
441 populations (undergoing natural changes in season temperatures) and from squirrels.  
442 Notwithstanding the lack of overlap between temperature ranges of different seasons, the breadth  
443 of all isolated strains were similar no matter what host they came from. On the other hand, the  
444 work of Sikorski *et al.* (53) showed increased tolerance to temperature among *Bacillus simplex*  
445 species isolated from a southern hill, that received more solar radiation and is consequently  
446 warmer and dryer, compared to strains from the northern hill. They also observed that the strains  
447 more tolerant (*B. simplex*) to temperature did not have a reduced capacity to grow at a lower  
448 temperature Sikorski and Nevo (53).

449 Can mesophilic *Bacillus* strains being exposed to strong selection at the limit of their temperature  
450 tolerance evolve thermophilic features or have they reached their temperature tolerance limit?  
451 Given their importance in food safety, several works have evaluated temperature tolerance in the  
452 *B. cereus sensu lato*. All in all, there are no examples of thermophilic strains in this group.  
453 Interestingly, seven major phylogenetic groups are now described that share a particular  
454 ‘ecotype’ structure in which each phylogenetic group exhibits its proper range of growth  
455 temperature and is for this reason associated with particular thermal niches. Clearly, only the  
456 *Bacillus cytotoxicus* (group VII) is thermotolerant (54). Interestingly, a trade-off is evident in

457 strains that are more tolerant, as they exhibit less capacity to grow at a lower temperature (55).  
458 Group VII strains in this phylogenetic scheme are now recognized as a novel species “*B.*  
459 *cytotoxicus*” having a clearly distinguishing moderate thermotolerant phenotype (56) and being  
460 genetically distant from more than 200 *B. cereus* examined (57). Interestingly, even spore  
461 inactivation temperatures are different among the *B. cereus* groups, with those that tolerate more  
462 temperature in the vegetative stage also requiring more temperature for spore inactivation (58),  
463 (55). Several works have evaluated the temperature for spore inactivation in different *Bacillus*  
464 species. Den Besten et al. reviewed data for *Bacillus* spp. collected from different places, mainly  
465 food sources. Although there is variation in heat inactivation of spores, those of Bs lineage seem  
466 to be more tolerant than those of Bc lineage (59).

467 It has been suggested that in ectotherms in a rapidly changing environment there is a trade-off  
468 between maximal performance, particularly in thermal specialists in contrast to thermal  
469 generalists (45). Miller and Castenhotz (60) evaluated *Synechococcus* from hot-springs and noted  
470 that as the upper-temperature limit for growth was extended, an even larger shift upward in the  
471 minimum temperature was observed, leading them to suggest that increases in thermal  
472 specialization resulted in a decrease in the overall temperature range for growth. In this work,  
473 only for some strain we observed that higher performance at temperatures beyond 37 °C came at  
474 a cost to growth at a lower temperature.

475 Data from different reports is consistent with our observation that genetic architecture is a  
476 defining element to temperature tolerance. Lineage can be easily identified through its norm of  
477 reaction in both environments, the genetics behind the response to temperature may constrain  
478 changes in phenotypic plasticity. Environmentally induced plastic phenotypes are thought to be  
479 controlled by gene regulatory networks (61) that often have a common regulation. Environment-

480 specific gene expression has long been appreciated to underlie plasticity in prokaryotes (see for  
481 example (62)). The heat shock response was the first regulatory system discovered and is  
482 considered one of the fundamental systems concerning general stress (63). Some effectors of the  
483 heat shock proteins are highly conserved in all three domains of life. Bacteria and lower  
484 eukaryotes share conserved families of chaperones and maybe also conserve the complexity of  
485 thermal systems such as chaperone networks (37), which as a system may be slower to evolve.  
486 This may be the reason for the resistance to change in genetic lineages and would explain why  
487 there is a correlation in plasticity to temperature as a function of the organisms' genetics, and not  
488 of the environment. It is also possible that environmental parameters other than temperature (e.g.,  
489 nutrient availability, pH, and interactions with other microorganisms) may influence the overall  
490 fitness of these organisms and thus limit their plasticity.

491 In summary, phenotypic plasticity of temperature tolerance (thermal acclimation) is considered  
492 an important component of the evolutionary response to variable temperatures and specifically as  
493 a relevant response to climate change (4). Understanding how organisms respond and adapt to  
494 novel environments is critical to our efforts to conserve biodiversity and maintain ecosystem  
495 function. It was not expected that the heat tolerance phenotype of the *Bacillus* in the hot spring  
496 would not match its habitat's temperature. Phenotypic plasticity seems to be a lineage trait, each  
497 of the *Bacillus* lineages seems to possess a distinctive reaction norm to temperature and possibly  
498 a rigid genetic architecture that limits convergence. It is possible that substantial molecular  
499 changes may be required to increase upper thermal limits for the *Bacillus* and that the observed  
500 limited tolerance to temperature reflects evolutionary constraints. If this scenario is also true for  
501 other bacteria, the limited potential to change their thermal limits should be a strong warning  
502 particularly within the context of an average predicted temperature increase of 2–4 °C for mid-

503 latitude populations over the next few decades. It would be interesting to test the hypothesis of  
504 the genetic constraints on thermal tolerance by subjecting the *Bacillus* strains from the temperate  
505 environment to experimental evolution to find their thermal boundaries.

506

### 507 **Conclusion:**

508 Despite sharing the same environment (hot or temperate) the evaluated *Bacillus* strains from the  
509 two lineages do not converge in their norms of reaction to temperature. Deep evolutionary  
510 differences define the genetic possibilities of plasticity to temperature, such that the norms of  
511 reaction to temperature can be considered a strong lineage signature for the Bc and Bs strains  
512 analyzed. Sporulation allows the hot-spring *Bacillus* strains to exceed what would be their  
513 temperature tolerance limit in the vegetative stage, and although the spore state allows their  
514 survival, it may reduce opportunities to evolve higher tolerance. However, given that the thermal  
515 niche was observed to be shifted only a few degrees toward more tolerance to temperature, it is  
516 possible that there is a genetic architecture constraint and that these lineages have reached their  
517 tolerance limit. The reduced plasticity exhibited by these bacterial lineages should be a warning  
518 for the limited capability, even of bacteria, to adjust to climate change.

519

### 520 **Acknowledgments**

521 Fund for this work came from Consejo Nacional de Ciencia y Tecnología (Conacyt) Básica 2014  
522 CLAVE 220536 to G. O.A. E.H. acknowledges fellowship from Consejo Nacional de Ciencia y  
523 tecnología (Conacyt). We acknowledge the technical help of many under-graduate students. We  
524 are grateful to Dr. Gabriel Moreno for many fruitful discussions.

525

526 **Competing Interests**

527 There authors declare that there are no competing financial interests in relation to the work  
528 described.

529

530 **Conflict of Interest**

531 The authors declare that they have no conflict of interest.

532

533 **REFERENCES**

534 1. Hoffmann AA, Parsons PA. Extreme Environmental Change and Evolution. Cambridge  
535 University Press; 1997. 259 p.

536 2. Graumann PL, Marahiel MA. Cold shock response in *Bacillus subtilis*. *J Mol Microbiol*  
537 *Biotechnol.* 1999 Nov;1(2):203–9.

538 3. Bronikowski AM, Bennett AF, Lenski RE. Evolutionary adaptation to temperature. VIII.  
539 Effects of temperature on growth rate in natural isolates of *Escherichia coli* and *Salmonella*  
540 *enterica* from different thermal environments. *Evolution.* 2001 Jan;55(1):33–40.

541 4. Hoffmann AA, Chown SL, Clusella-Trullas S. Upper thermal limits in terrestrial  
542 ectotherms: how constrained are they? Fox C, editor. *Funct Ecol.* 2013 Aug 16;27(4):934–49.

543 5. Araújo MB, Ferri-Yáñez F, Bozinovic F, Marquet PA, Valladares F, Chown SL. Heat  
544 freezes niche evolution. *Ecol Lett.* 2013 Sep;16(9):1206–19.

545 6. Sunday J, Bennett JM, Calosi P, Clusella-Trullas S, Gravel S, Hargreaves AL, et al.  
546 Thermal tolerance patterns across latitude and elevation. *Philos Trans R Soc Lond B Biol Sci.*  
547 2019 Aug 5;374(1778):20190036.



- 548 7. Price PB, Sowers T. Temperature dependence of metabolic rates for microbial growth,  
549 maintenance, and survival. *Proc Natl Acad Sci U S A*. 2004 Mar 30;101(13):4631–6.
- 550 8. Kristjansson JK. *Thermophilic Bacteria*. CRC Press; 1991. 240 p.
- 551 9. Murren CJ, Auld JR, Callahan H, Ghalambor CK, Handelsman CA, Heskell MA, et al.  
552 Constraints on the evolution of phenotypic plasticity: limits and costs of phenotype and plasticity.  
553 *Heredity* . 2015 Oct;115(4):293–301.
- 554 10. van Gestel J, Weissing FJ. Regulatory mechanisms link phenotypic plasticity to  
555 evolvability. *Sci Rep*. 2016 Apr 18;6:24524.
- 556 11. Stearns SC. The Evolutionary Significance of Phenotypic Plasticity. *Bioscience*.  
557 1989;39(7):436–45.
- 558 12. Pigliucci M, Murren CJ. Perspective: Genetic assimilation and a possible evolutionary  
559 paradox: can macroevolution sometimes be so fast as to pass us by? *Evolution*. 2003  
560 Jul;57(7):1455–64.
- 561 13. Snell-Rood EC, Kobiela ME, Sikkink KL, Shephard AM. Mechanisms of Plastic Rescue  
562 in Novel Environments. *Annu Rev Ecol Evol Syst*. 2018 Nov 2;49(1):331–54.
- 563 14. Snell-Rood EC, Van Dyken JD, Cruickshank T, Wade MJ, Moczek AP. Toward a  
564 population genetic framework of developmental evolution: the costs, limits, and consequences of  
565 phenotypic plasticity. *Bioessays*. 2010 Jan;32(1):71–81.
- 566 15. Angilletta MJ Jr, Angilletta MJ. *Thermal Adaptation: A Theoretical and Empirical*  
567 *Synthesis*. OUP Oxford; 2009. 289 p.
- 568 16. Hendry AP. Key Questions on the Role of Phenotypic Plasticity in Eco-Evolutionary  
569 Dynamics. *J Hered*. 2016 Jan;107(1):25–41.

- 570 17. Levis NA, Pfennig DW. Plasticity-led evolution: A survey of developmental mechanisms  
571 and empirical tests. *Evol Dev.* 2020 Jan;22(1-2):71–87.
- 572 18. Zeigler DR, Nicholson WL. Experimental evolution of *Bacillus subtilis*. *Environ*  
573 *Microbiol.* 2017 Sep;19(9):3415–22.
- 574 19. Bennett AF, Lenski RE, Mittler JE. EVOLUTIONARY ADAPTATION TO  
575 TEMPERATURE. I. FITNESS RESPONSES OF *ESCHERICHIA COLI* TO CHANGES IN ITS  
576 THERMAL ENVIRONMENT. *Evolution.* 1992 Feb;46(1):16–30.
- 577 20. Bennett AF, Lenski RE. EVOLUTIONARY ADAPTATION TO TEMPERATURE II.  
578 THERMAL NICHE OF EXPERIMENTAL LINES OF *ESCHERICHIA COLI*. *Evolution.* 1993  
579 Feb;47(1):1–12.
- 580 21. Tenaillon O, Rodríguez-Verdugo A, Gaut RL, McDonald P, Bennett AF, Long AD, et al.  
581 The molecular diversity of adaptive convergence. *Science.* 2012 Jan 27;335(6067):457–61.
- 582 22. Mongold JA, Bennett AF, Lenski RE. EVOLUTIONARY ADAPTATION TO  
583 TEMPERATURE. IV. ADAPTATION OF *ESCHERICHIA COLI* AT A NICHE BOUNDARY.  
584 *Evolution.* 1996 Feb;50(1):35–43.
- 585 23. Ravel J, Fraser CM. Genomics at the genus scale. *Trends Microbiol.* 2005 Mar;13(3):95–  
586 7.
- 587 24. Hernández-González IL, Moreno-Hagelsieb G, Olmedo-Álvarez G. Environmentally-  
588 driven gene content convergence and the *Bacillus* phylogeny. *BMC Evol Biol.* 2018 Oct  
589 3;18(1):148.
- 590 25. Souza V, Moreno-Letelier A, Travisano M, Alcaraz LD, Olmedo G, Eguiarte LE. The lost  
591 world of Cuatro Ciénegas Basin, a relictual bacterial niche in a desert oasis. *Elife.*  
592 2018;7:e38278.

- 593 26. Logan NALA, Allan RNAN. Aerobic, Endospore-Forming Bacteria from Antarctic  
594 Geothermal Soils. In: Dion P, Nautiyal CS, editors. Microbiology of Extreme Soils. Berlin,  
595 Heidelberg: Springer Berlin Heidelberg; 2008. p. 155–75.
- 596 27. Fritze D. Taxonomy of the genus bacillus and related genera: the aerobic endospore-  
597 forming bacteria. *Phytopathology*. 2004 Nov;94(11):1245–8.
- 598 28. Weltzer ML, Miller SR. Ecological divergence of a novel group of Chloroflexus strains  
599 along a geothermal gradient. *Appl Environ Microbiol*. 2013 Feb;79(4):1353–8.
- 600 29. Klatt CG, Wood JM, Rusch DB, Bateson MM, Hamamura N, Heidelberg JF, et al.  
601 Community ecology of hot spring cyanobacterial mats: predominant populations and their  
602 functional potential. *ISME J*. 2011 Aug;5(8):1262–78.
- 603 30. Bazinet AL. Pan-genome and phylogeny of *Bacillus cereus sensu lato*. *BMC Evol Biol*.  
604 2017 Aug 2;17(1):176.
- 605 31. Zeigler DR. The genome sequence of *Bacillus subtilis* subsp. *spizizenii* W23: insights into  
606 speciation within the *B. subtilis* complex and into the history of *B. subtilis* genetics.  
607 *Microbiology*. 2011 Jul;157(Pt 7):2033–41.
- 608 32. Alcaraz LD, Moreno-Hagelsieb G, Eguiarte LE, Souza V, Herrera-Estrella L, Olmedo G.  
609 Understanding the evolutionary relationships and major traits of *Bacillus* through comparative  
610 genomics. *BMC Genomics*. 2010 May 26;11:332.
- 611 33. Rodríguez-Torres MD, Islas-Robles Á, Gómez-Lunar Z, Delaye L, Hernández-González  
612 I, Souza V, et al. Phenotypic Microdiversity and Phylogenetic Signal Analysis of Traits Related  
613 to Social Interaction in *Bacillus* spp. from Sediment Communities. *Front Microbiol*. 2017 Jan  
614 30;8:29.

- 615 34. Gómez-Lunar Z, Hernández-González I, Rodríguez-Torres M-D, Souza V, Olmedo-  
616 Álvarez G. Microevolution Analysis of *Bacillus coahuilensis* Unveils Differences in Phosphorus  
617 Acquisition Strategies and Their Regulation. *Front Microbiol.* 2016 Feb 8;7:58.
- 618 35. Tettelin H, Massignani V, Cieslewicz MJ, Donati C, Medini D, Ward NL, et al. Genome  
619 analysis of multiple pathogenic isolates of *Streptococcus agalactiae*: Implications for the  
620 microbial “pan-genome.” *Proc Natl Acad Sci U S A.* 2005 Sep 27;102(39):13950–5.
- 621 36. Barria C, Malecki M, Arraiano CM. Bacterial adaptation to cold. *Microbiology.* 2013  
622 Dec;159(Pt 12):2437–43.
- 623 37. Richter K, Haslbeck M, Buchner J. The heat shock response: life on the verge of death.  
624 *Mol Cell.* 2010 Oct 22;40(2):253–66.
- 625 38. Canganella F, Wiegel J. Extremophiles: from abyssal to terrestrial ecosystems and  
626 possibly beyond. *Naturwissenschaften.* 2011 Apr;98(4):253–79.
- 627 39. Cerritos R, Eguiarte LE, Avitia M, Siefert J, Travisano M, Rodríguez-Verdugo A, et al.  
628 Diversity of culturable thermo-resistant aquatic bacteria along an environmental gradient in  
629 Cuatro Ciénegas, Coahuila, México. *Antonie Van Leeuwenhoek.* 2011 Feb;99(2):303–18.
- 630 40. Prieto-Barajas CM, Alfaro-Cuevas R, Valencia-Cantero E, Santoyo G. Effect of  
631 seasonality and physicochemical parameters on bacterial communities in two hot spring  
632 microbial mats from Araró, Mexico. *Rev Mex Biodivers [Internet].* 2017 Aug 21 [cited 2020  
633 May 4];88(3). Available from: <http://revista.ib.unam.mx/index.php/bio/article/view/1999>
- 634 41. Youngman P, Perkins JB, Losick R. Construction of a cloning site near one end of Tn917  
635 into which foreign DNA may be inserted without affecting transposition in *Bacillus subtilis* or  
636 expression of the transposon-borne *erm* gene. *Plasmid.* 1984 Jul 1;12(1):1–9.

- 637 42. Hall BG. Building phylogenetic trees from molecular data with MEGA. *Mol Biol Evol.*  
638 2013 May;30(5):1229–35.
- 639 43. Pérez-Gutiérrez R-A, López-Ramírez V, Islas Á, Alcaraz LD, Hernández-González I,  
640 Olivera BCL, et al. Antagonism influences assembly of a *Bacillus* guild in a local community and  
641 is depicted as a food-chain network. *ISME J.* 2013 Mar;7(3):487–97.
- 642 44. Martiny JBH, Jones SE, Lennon JT, Martiny AC. Microbiomes in light of traits: A  
643 phylogenetic perspective. *Science.* 2015 Nov 6;350(6261):aac9323.
- 644 45. Huey RB, Kingsolver JG. Evolution of Resistance to High Temperature in Ectotherms.  
645 *Am Nat.* 1993;142:S21–46.
- 646 46. Holtmann G, Bremer E. Thermoprotection of *Bacillus subtilis* by exogenously provided  
647 glycine betaine and structurally related compatible solutes: involvement of Opu transporters. *J*  
648 *Bacteriol.* 2004 Mar;186(6):1683–93.
- 649 47. Székely AJ, Langenheder S. The importance of species sorting differs between habitat  
650 generalists and specialists in bacterial communities. *FEMS Microbiol Ecol.* 2014 Jan;87(1):102–  
651 12.
- 652 48. Huang M, Hull CM. Sporulation: how to survive on planet Earth (and beyond). *Curr*  
653 *Genet.* 2017 Oct;63(5):831–8.
- 654 49. Piggot PJ, Hilbert DW. Sporulation of *Bacillus subtilis*. *Curr Opin Microbiol.* 2004  
655 Dec;7(6):579–86.
- 656 50. Setlow P. Mechanisms for the prevention of damage to DNA in spores of *Bacillus*  
657 species. *Annu Rev Microbiol.* 1995;49:29–54.

- 658 51. Bennett, Albert F, Richard E. Lenski, John E. Mittler. Evolutionary adaptation to  
659 temperature. I. Fitness responses of *Escherichia coli* to changes in its thermal environment.  
660 *Evolution*. 1992;46(1):16–30.
- 661 52. Cooper VS, Bennett AF, Lenski RE. Evolution of thermal dependence of growth rate of  
662 *Escherichia coli* populations during 20,000 generations in a constant environment. *Evolution*.  
663 2001 May;55(5):889–96.
- 664 53. Sikorski J, Nevo E. Patterns of thermal adaptation of *Bacillus simplex* to the  
665 microclimatically contrasting slopes of “Evolution Canyons” I and II, Israel. *Environ Microbiol*.  
666 2007 Mar;9(3):716–26.
- 667 54. Guinebretière M-H, Thompson FL, Sorokin A, Normand P, Dawyndt P, Ehling-Schulz  
668 M, et al. Ecological diversification in the *Bacillus cereus* Group. *Environ Microbiol*. 2008  
669 Apr;10(4):851–65.
- 670 55. Luu-Thi H, Khadka DB, Michiels CW. Thermal inactivation parameters of spores from  
671 different phylogenetic groups of *Bacillus cereus*. *Int J Food Microbiol*. 2014 Oct 17;189:183–8.
- 672 56. Guinebretière M-H, Auger S, Galleron N, Contzen M, De Sarrau B, De Buyser M-L, et al.  
673 *Bacillus cytotoxicus* sp. nov. is a novel thermotolerant species of the *Bacillus cereus* Group  
674 occasionally associated with food poisoning. *Int J Syst Evol Microbiol*. 2013 Jan;63(Pt 1):31–40.
- 675 57. Liu Y, Lai Q, Göker M, Meier-Kolthoff JP, Wang M, Sun Y, et al. Genomic insights into  
676 the taxonomic status of the *Bacillus cereus* group. *Sci Rep*. 2015 Sep 16;5:14082.
- 677 58. Warth AD. Relationship between the heat resistance of spores and the optimum and  
678 maximum growth temperatures of *Bacillus* species. *J Bacteriol*. 1978 Jun;134(3):699–705.
- 679 59. den Besten HMW, Wells-Bennik MHJ, Zwietering MH. Natural Diversity in Heat  
680 Resistance of Bacteria and Bacterial Spores: Impact on Food Safety and Quality. *Annu Rev Food*

681 Sci Technol [Internet]. 2018 Mar 26 [cited 2020 May 5]; Available from:  
682 <https://www.annualreviews.org/doi/abs/10.1146/annurev-food-030117-012808>

683 60. Miller SR, Castenholz RW. THE EVOLUTION OF THERMOTOLERANCE IN HOT  
684 SPRING CYANOBACTERIA OF THE GENUS SYNECHOCOCCUS. J Phycol. 2000 Dec  
685 4;36(s3):48–48.

686 61. Schlichting CD, Pigliucci M. Control of phenotypic plasticity via regulatory genes. Am  
687 Nat. 1993 Aug;142(2):366–70.

688 62. Helmann JD, Wu MF, Kobel PA, Gamo FJ, Wilson M, Morshedi MM, et al. Global  
689 transcriptional response of *Bacillus subtilis* to heat shock. J Bacteriol. 2001 Dec;183(24):7318–  
690 28.

691 63. Neidhardt FC, VanBogelen RA. The heat shock response in *Escherichia coli* and  
692 *Salmonella typhimurium*. American Society for Microbiology. Washington, DC. 1987;

693

694

695 Figure Legends

696

697 Figure 1. Experimental approach to analyzing phenotypic plasticity in two lineages of bacteria  
698 from contrasting environments. a. Environments of isolation. Laguna Intermedia of Churince,  
699 Cuatrociénegas (temperature range of 17 to 40 oC) and Hot-springs in Michoacán (Mexico)  
700 (temperature range between 48 and 70 oC). b. Phylogenetic relationships for the *Bacillus* lineages  
701 representing mesophilic (M) and thermotolerant (T) life histories. *B. subtilis* and *B. cereus* from a  
702 Temperate-lagoon (blue), Hot-spring (red) and a laboratory strain (PY79) (extense phylogeny in  
703 supplementary Fig. 2). c. A norm of reaction represents performance of individuals under

704 different environmental conditions. The amplitude of the curve is the breath of the performance  
705 and thermal niche is the rank between the two x-values of 75% of maximal growth at optimal  
706 temperature (3). d. Scenarios of phenotypic plasticity: individuals from different lineages or  
707 environments may exhibit the same response (convergence), a shifted response of the isolates  
708 from the hot-spring, or even strain-specific patterns regardless of genetic lineage (blue lines,  
709 environment T; red lines, environment H).

710

711 Figure 2. Growth of colonies of strains from the two lineages and environments at different  
712 temperatures. Graphical representation of the size of single colonies after 24 and 48 h incubation  
713 at different temperatures (37, 44, 50 and 55 °C) on semisolid Marine Medium. Three isolated  
714 colonies were chosen, and their size represented in a circle; the inner circles and the outer circles  
715 represent, respectively, the lower and upper limits of the standard deviations error bars. Dashes  
716 indicate that no growth was observed. Supplementary Fig. 1 shows photographs from some of the  
717 plates.

718

719 Figure 3. Lineage-specific phenotypic plasticity as a response to temperature. a. Norms of  
720 reaction to temperature of the *B. cereus* and *B. subtilis* lineages from the Temperate lagoon. b.  
721 Norms of reaction to temperature of the *B. cereus* and *B. subtilis* lineages from the Hot-springs. c  
722 and d. Combined data from curves in a and b, to highlight similarities in the response within the  
723 *B. subtilis* (c) and *B. cereus* lineage (d). Dashed lines, *B. cereus* lineage, continuous lines, *B.*  
724 *subtilis* lineage. Dark and light blue, Temperate lagoon strains. Red and orange, Hot-springs  
725 strains. Response was evaluated at temperatures 17, 27, 37, 43, 46, 49, 55 oC.

726



727 Figure 4. Thermal niche of the *B. cereus* and *B. subtilis* lineages from the temperate lagoon and  
728 the Hot-springs. Thermal niche is simplified as the range between the two x-values of 75% of  
729 maximal growth at optimal temperature as described by (3) and depicted in Fig. 1b. Rectangles  
730 depict range at or above 75% of maximum growth of strains from the Temperate lagoon (blue)  
731 and the Hot-springs (red). Black bars across the rectangle indicate the optimal temperature for  
732 growth (strain Bs H 30 exhibits maximum growth at two temperatures). Gray dots, temperatures  
733 of evaluation 17, 27, 37, 43, 46, 49, 55 oC. Maximum growth rate at optimal temperature for  
734 each strain is depicted to the right.

735  
736 Figure 5. Phenotypic plasticity is constrained by genetic lineage a. Statistical analysis of growth  
737 rates of grouped-lineages. *B. subtilis* yellow, and *B. cereus* in green. Significant differences were  
738 obtained for growth response at five temperatures (red dots at 17, 27, 37, 39, 41oC). b. Statistical  
739 analysis of growth rates of grouped-by environment. T in blue, H in red. No significant  
740 differences in growth were observed when comparing data grouped-as-environments. Each curve  
741 represents the mean of growth rates for a set of strains. An ANOVA in R package 3.6.2 (at  
742 significance level at 0.05) was used to identify statistical differences in the double comparison,  
743 and intervals of confidence are shown with shaded area.

744

745

746

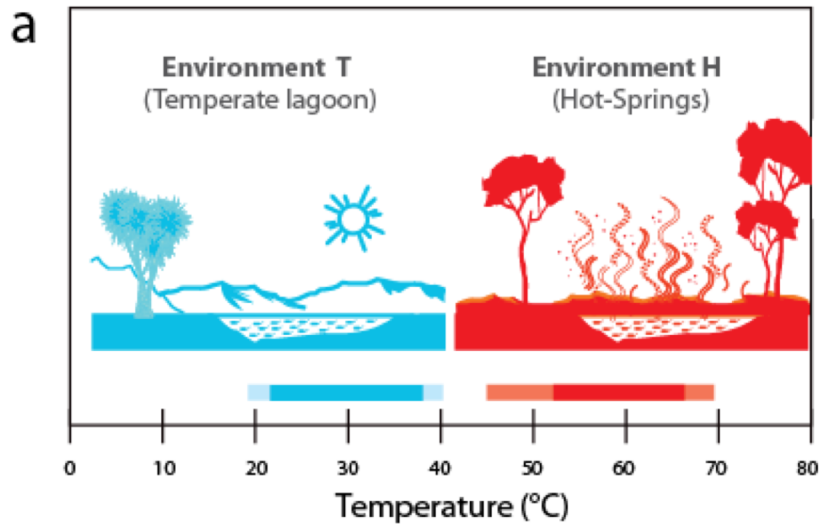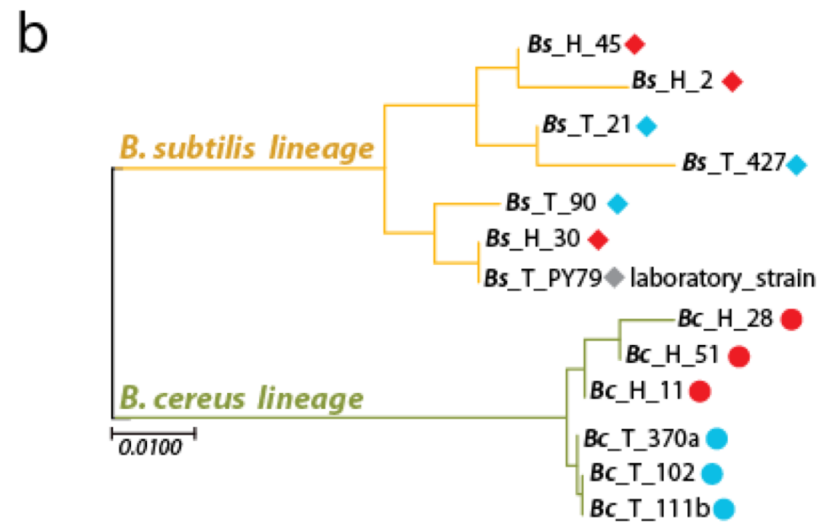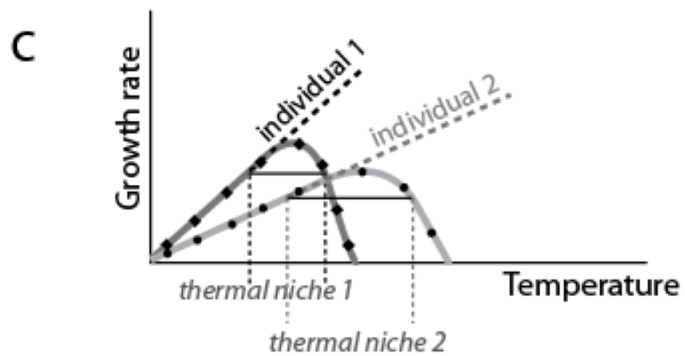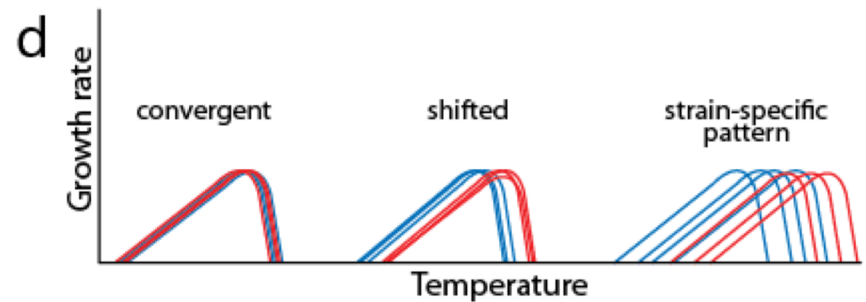

*Bacillus cereus sensu lato*

*Bacillus subtilis sensu lato*

Temperate lagoon

| Strain | Incubation |                  |    |    |    |
|--------|------------|------------------|----|----|----|
|        | time (h)   | Temperature (°C) |    |    |    |
|        |            | 37               | 44 | 50 | 55 |
| 370a   | 24         |                  |    | —  | —  |
|        | 48         |                  |    | —  | —  |
| 102    | 24         |                  |    | —  | —  |
|        | 48         |                  |    |    |    |
| 111b   | 24         |                  |    | —  | —  |
|        | 48         |                  |    | —  | —  |

| Strain | Incubation |                  |    |    |    |
|--------|------------|------------------|----|----|----|
|        | time (h)   | Temperature (°C) |    |    |    |
|        |            | 37               | 44 | 50 | 55 |
| 21     | 24         |                  |    |    |    |
|        | 48         |                  |    |    |    |
| 90     | 24         |                  |    |    | —  |
|        | 48         |                  |    |    | —  |
| 427    | 24         |                  |    |    |    |
|        | 48         |                  |    |    |    |
| PY79   | 24         |                  |    |    |    |
|        | 48         |                  |    |    |    |

Hot spring

|    |    |  |  |   |   |
|----|----|--|--|---|---|
| 11 | 24 |  |  | — | — |
|    | 48 |  |  |   |   |
| 28 | 24 |  |  |   | — |
|    | 48 |  |  |   |   |
| 51 | 24 |  |  | — | — |
|    | 48 |  |  | — |   |

|    |    |  |  |  |  |
|----|----|--|--|--|--|
| 2  | 24 |  |  |  |  |
|    | 48 |  |  |  |  |
| 30 | 24 |  |  |  |  |
|    | 48 |  |  |  |  |
| 45 | 24 |  |  |  |  |
|    | 48 |  |  |  |  |

scale: 7.74mm

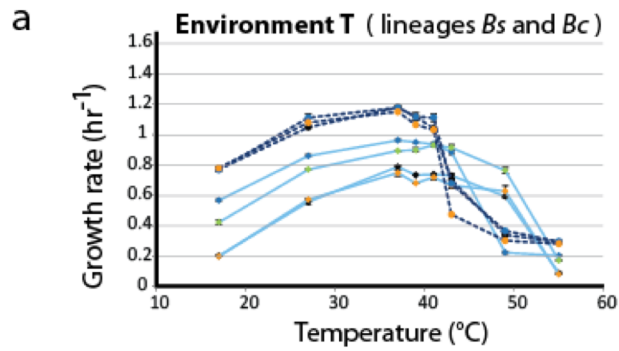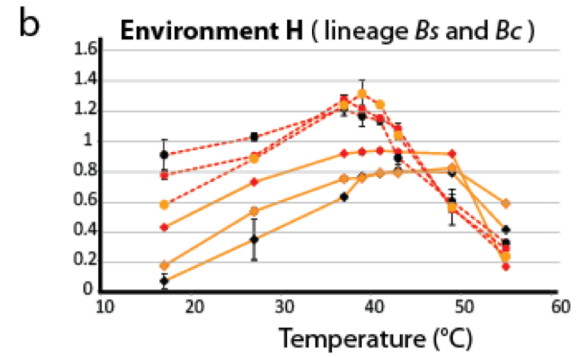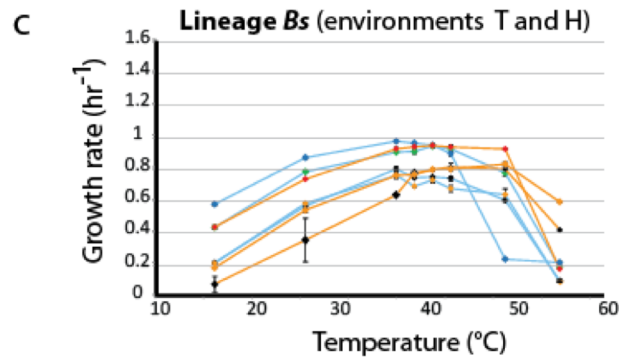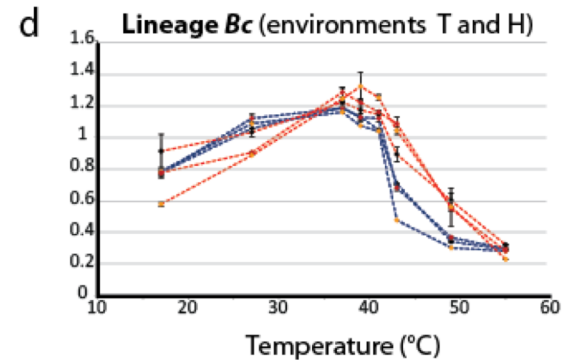

Environment T  
(Temperate lagoon)

*Bs* (contin. line)    ◆ 21    ◆ 90    ◆ 427    ◆ PY79

*Bc* (dotted line)    ● 370a    ● 102    ● 111b

Environment H  
(Hot springs)

◆ 2    ◆ 30    ◆ 45

● 11    ● 28    ● 51

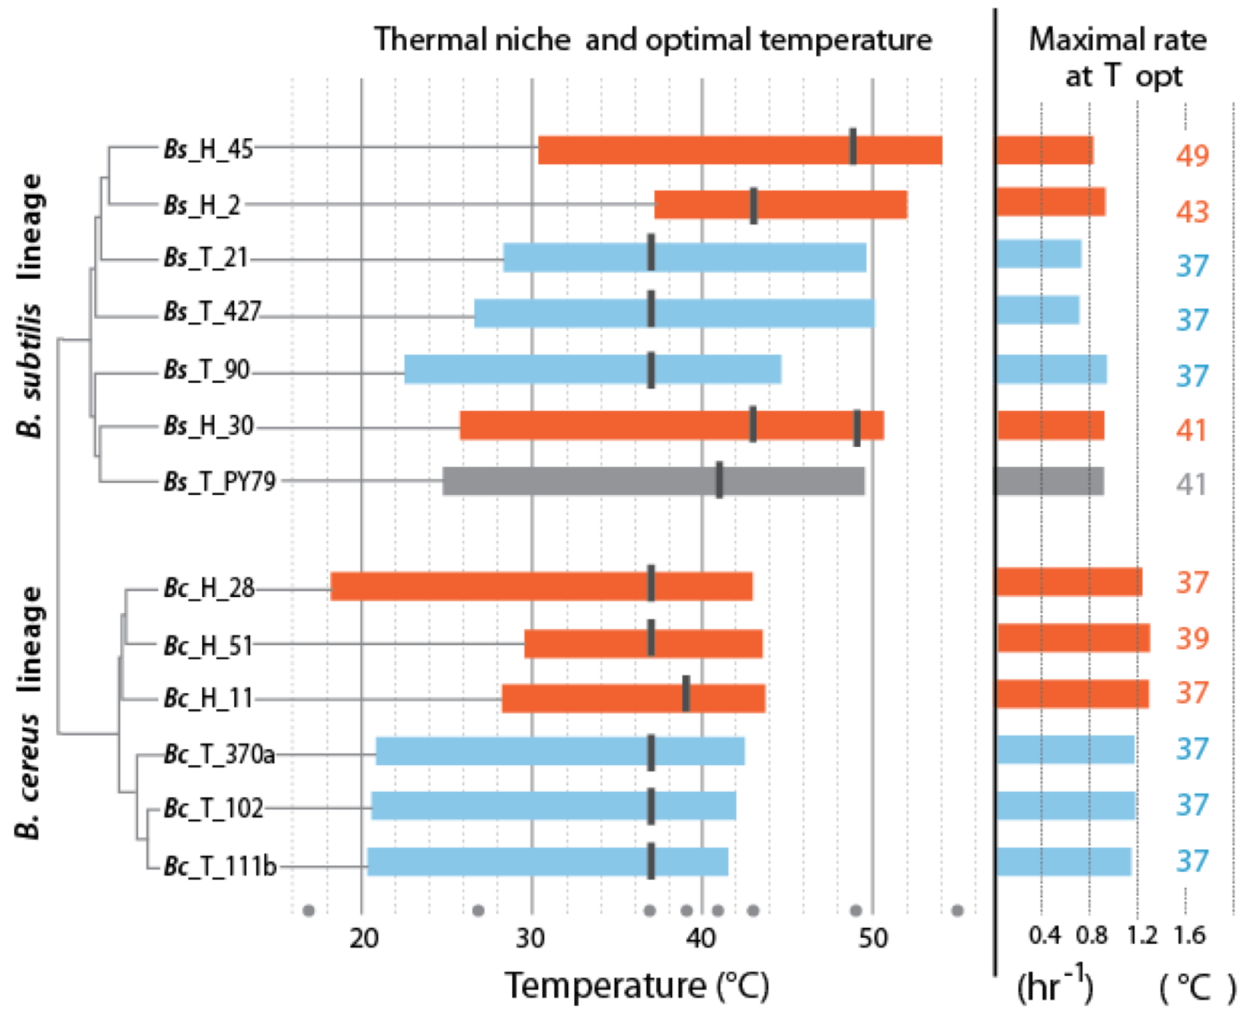

**a**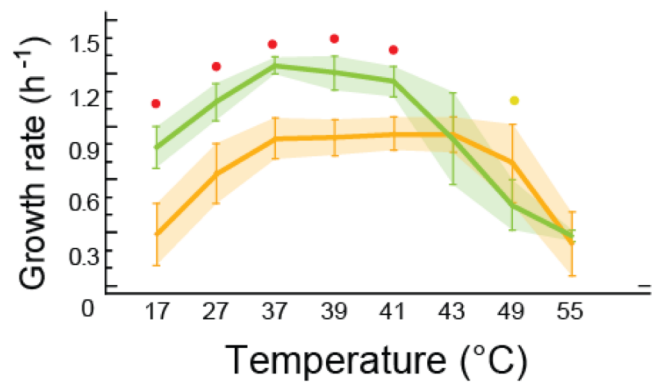**b**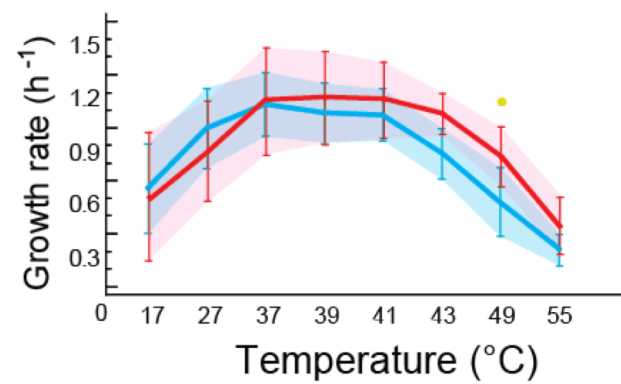

Source: http://biorxiv.org/content/10.1101/2020.08.22.262865v1.full.pdf
